# Supplementary material for: Effect of a Supervised Peridialytic Exercise Program on Serum Asymmetric Dimethylarginine in Maintenance Hemodialysis Patients
Source: Hindawi journal article supplement (doi:10.1155/2020/8878306), 2020-10-24
Supplement: f1 [file 8878306.f1.pdf]

1  
2**Table 1: Comparison of the Study Parameters before and after the 6-Months Exercise Program**

| Parameter                                           | Before Exercise  | After Exercise   | Statistical Test | P Value   |
|-----------------------------------------------------|------------------|------------------|------------------|-----------|
| Haemoglobin (gm/dL)                                 | 8.82 ± 0.8       | 8.94 ± 0.7       | Paired t test    | 0.058     |
| S. Urea (mg/dL)                                     | 104.23 ± 28.5    | 109 ± 29.5       | WSR              | 0.401     |
| Kt/V                                                | 1.03 ± 0.1       | 1.07 ± 0.1       | Paired t test    | 0.103     |
| S. Creatinine (mg/dL)                               | 6.47 ± 1.6       | 6.88 ± 1.4       | WSR              | 0.183     |
| S. Calcium (mg/dL)                                  | 9.06 ± 1.1       | 8.8 ± 1.3        | WSR              | 0.371     |
| S. Phosphorus (mg/dL)                               | 5.22 ± 1.4       | 5.82 ± 1.2       | WSR              | 0.041*    |
| Ca X Ph Product (mg <sup>2</sup> /dL <sup>2</sup> ) | 47.17 ± 13.2     | 51.41 ± 13.9     | Paired t test    | 0.168     |
| S. CRP (mg/L)                                       | 13.94 ± 17.7     | 12.55 ± 13.8     | WSR              | 0.627     |
| S. ADMA (ng/mL)                                     | 3205.68 ± 2648.3 | 5335.23 ± 4502.2 | WSR              | < 0.001** |
| Physical Activity (Low / Moderate)                  | 37 / 7           | 23 / 21          | χ <sup>2</sup>   | < 0.001** |
| Physical Activity (METs . minutes / Week)           | 536.25 ± 361.6   | 708.34 ± 372.8   | WSR              | < 0.001** |

3 S.: Serum, Ca: Calcium, Ph: phosphorus, CRP: C-reactive protein, ADMA: asymmetric  
4 dimethylarginine, METs: metabolic equivalents, WSR: Wilcoxon signed rank test, χ<sup>2</sup>: Chi-  
5 square test, \*: Significant (P<0.05), \*\*: highly significant (P<0.01).

6 All continuous data are expressed as mean ± standard deviation.

7

8  
9**Table 2: Comparison of Patients with Decreasing/Stable S. ADMA to Patients with Increasing S. ADMA**

| Parameter                                                | Decreasing ADMA (N = 13) | Increasing ADMA (N = 31) | Statistical Test   | P Value |
|----------------------------------------------------------|--------------------------|--------------------------|--------------------|---------|
| Sex (Male / Female)                                      | 7 / 6                    | 15 / 16                  | $\chi^2$           | 0.741   |
| Age (Years)                                              | 46.08 $\pm$ 12.8         | 50.9 $\pm$ 10            | MW                 | 0.321   |
| Duration of Dialysis (Months)                            | 61.15 $\pm$ 32.1         | 53.74 $\pm$ 28.8         | MW                 | 0.589   |
| Haemoglobin (gm/dL)                                      | 8.78 $\pm$ 0.7           | 8.83 $\pm$ 0.8           | Independent t test | 0.852   |
| S. Urea (mg/dL)                                          | 93.46 $\pm$ 27.6         | 108.74 $\pm$ 28          | Independent t test | 0.109   |
| Kt/V                                                     | 1.09 $\pm$ 0.1           | 1 $\pm$ 0.1              | Independent t test | 0.02*   |
| S. Creatinine (mg/dL)                                    | 6.25 $\pm$ 1.6           | 6.55 $\pm$ 1.6           | MW                 | 0.487   |
| S. Calcium (mg/dL)                                       | 8.89 $\pm$ 0.9           | 9.14 $\pm$ 1.1           | Independent t test | 0.452   |
| S. Phosphorus (mg/dL)                                    | 5.82 $\pm$ 1.7           | 4.97 $\pm$ 1.2           | Independent t test | 0.122   |
| Ca X Ph Product (mg <sup>2</sup> /dL <sup>2</sup> )      | 51.35 $\pm$ 15.1         | 45.42 $\pm$ 12.2         | Independent t test | 0.225   |
| S. CRP (mg/L)                                            | 13.35 $\pm$ 13.9         | 14.18 $\pm$ 19.2         | MW                 | 0.911   |
| S. ADMA (ng/mL) before Exercise                          | 4461.54 $\pm$ 3433.7     | 2679.03 $\pm$ 2089.7     | MW                 | 0.016*  |
| S. ADMA (ng/mL) after Exercise                           | 2384.62 $\pm$ 2030       | 6572.58 $\pm$ 4695.8     | MW                 | 0.000** |
| Physical Activity before Exercise (Low / Moderate)       | 8 / 5                    | 29 / 2                   | Fisher Exact Test  | 0.017*  |
| Physical Activity before Exercise (METs / Week)          | 594 $\pm$ 416.3          | 512.03 $\pm$ 340.6       | MW                 | 0.517   |
| Physical Activity after Exercise (Low / Moderate)        | 6 / 7                    | 17 / 14                  | $\chi^2$           | 0.599   |
| Physical Activity after Exercise (METs . minutes / Week) | 774 $\pm$ 416.3          | 680.81 $\pm$ 356.6       | MW                 | 0.509   |
| Intra-Dialytic Hypotensive Episodes                      | 11.31 $\pm$ 4.8          | 15.45 $\pm$ 5.6          | Independent t test | 0.019*  |

10 Unless stated otherwise, laboratory parameters are compared for the initial values (before the  
11 exercise program). S.: Serum, Ca: Calcium, Ph: phosphorus, CRP: C-reactive protein,  
12 ADMA: asymmetric dimethylarginine, METs: metabolic equivalents, MW: Mann Whitney  
13 test,  $\chi^2$  : Chi-square test, \*: Significant (P<0.05). All continuous data are expressed as mean  
14  $\pm$  standard deviation.  
15
